# Supplementary material
Source: MDPI journal article supplement (https://www.mdpi.com/2073-4344/7/11/349)
Supplement: s1 [file s1]

Synergistic enhancement in catalytic performance of superparamagnetic Fe3O4@*Bacilus subtilis* as recyclable Fenton-like catalyst

Pei Zheng 1,*, Zhe Pan 2, Jun Zhang 1,3

1 College of Geography and Environment, Baoji University of Arts and Sciences,Baoji 721013, China; zhengpei19890220@163.com (P.Z.) ; zhangjun1190@126.com (J. Z.)

2 College of Chemistry and Chemical Engineering, Baoji University of Arts and Sciences, Baoji 721013, China; panzhe19880116@163.com (Z.P.)

3 Key Laboratory of Subsurface Hydrology and Ecological Effects in Arid Region, Chang’an University, Xi’an 710064, China; zhangjun1190@126.com (J. Z.)

***** Correspondence: zhengpei19890220@163.com; Tel: +86 15902916848

**Figure S1.** Size histogram of *B. subtilis* (a and b) and Fe3O4@ *B. subtilis* (c and d).


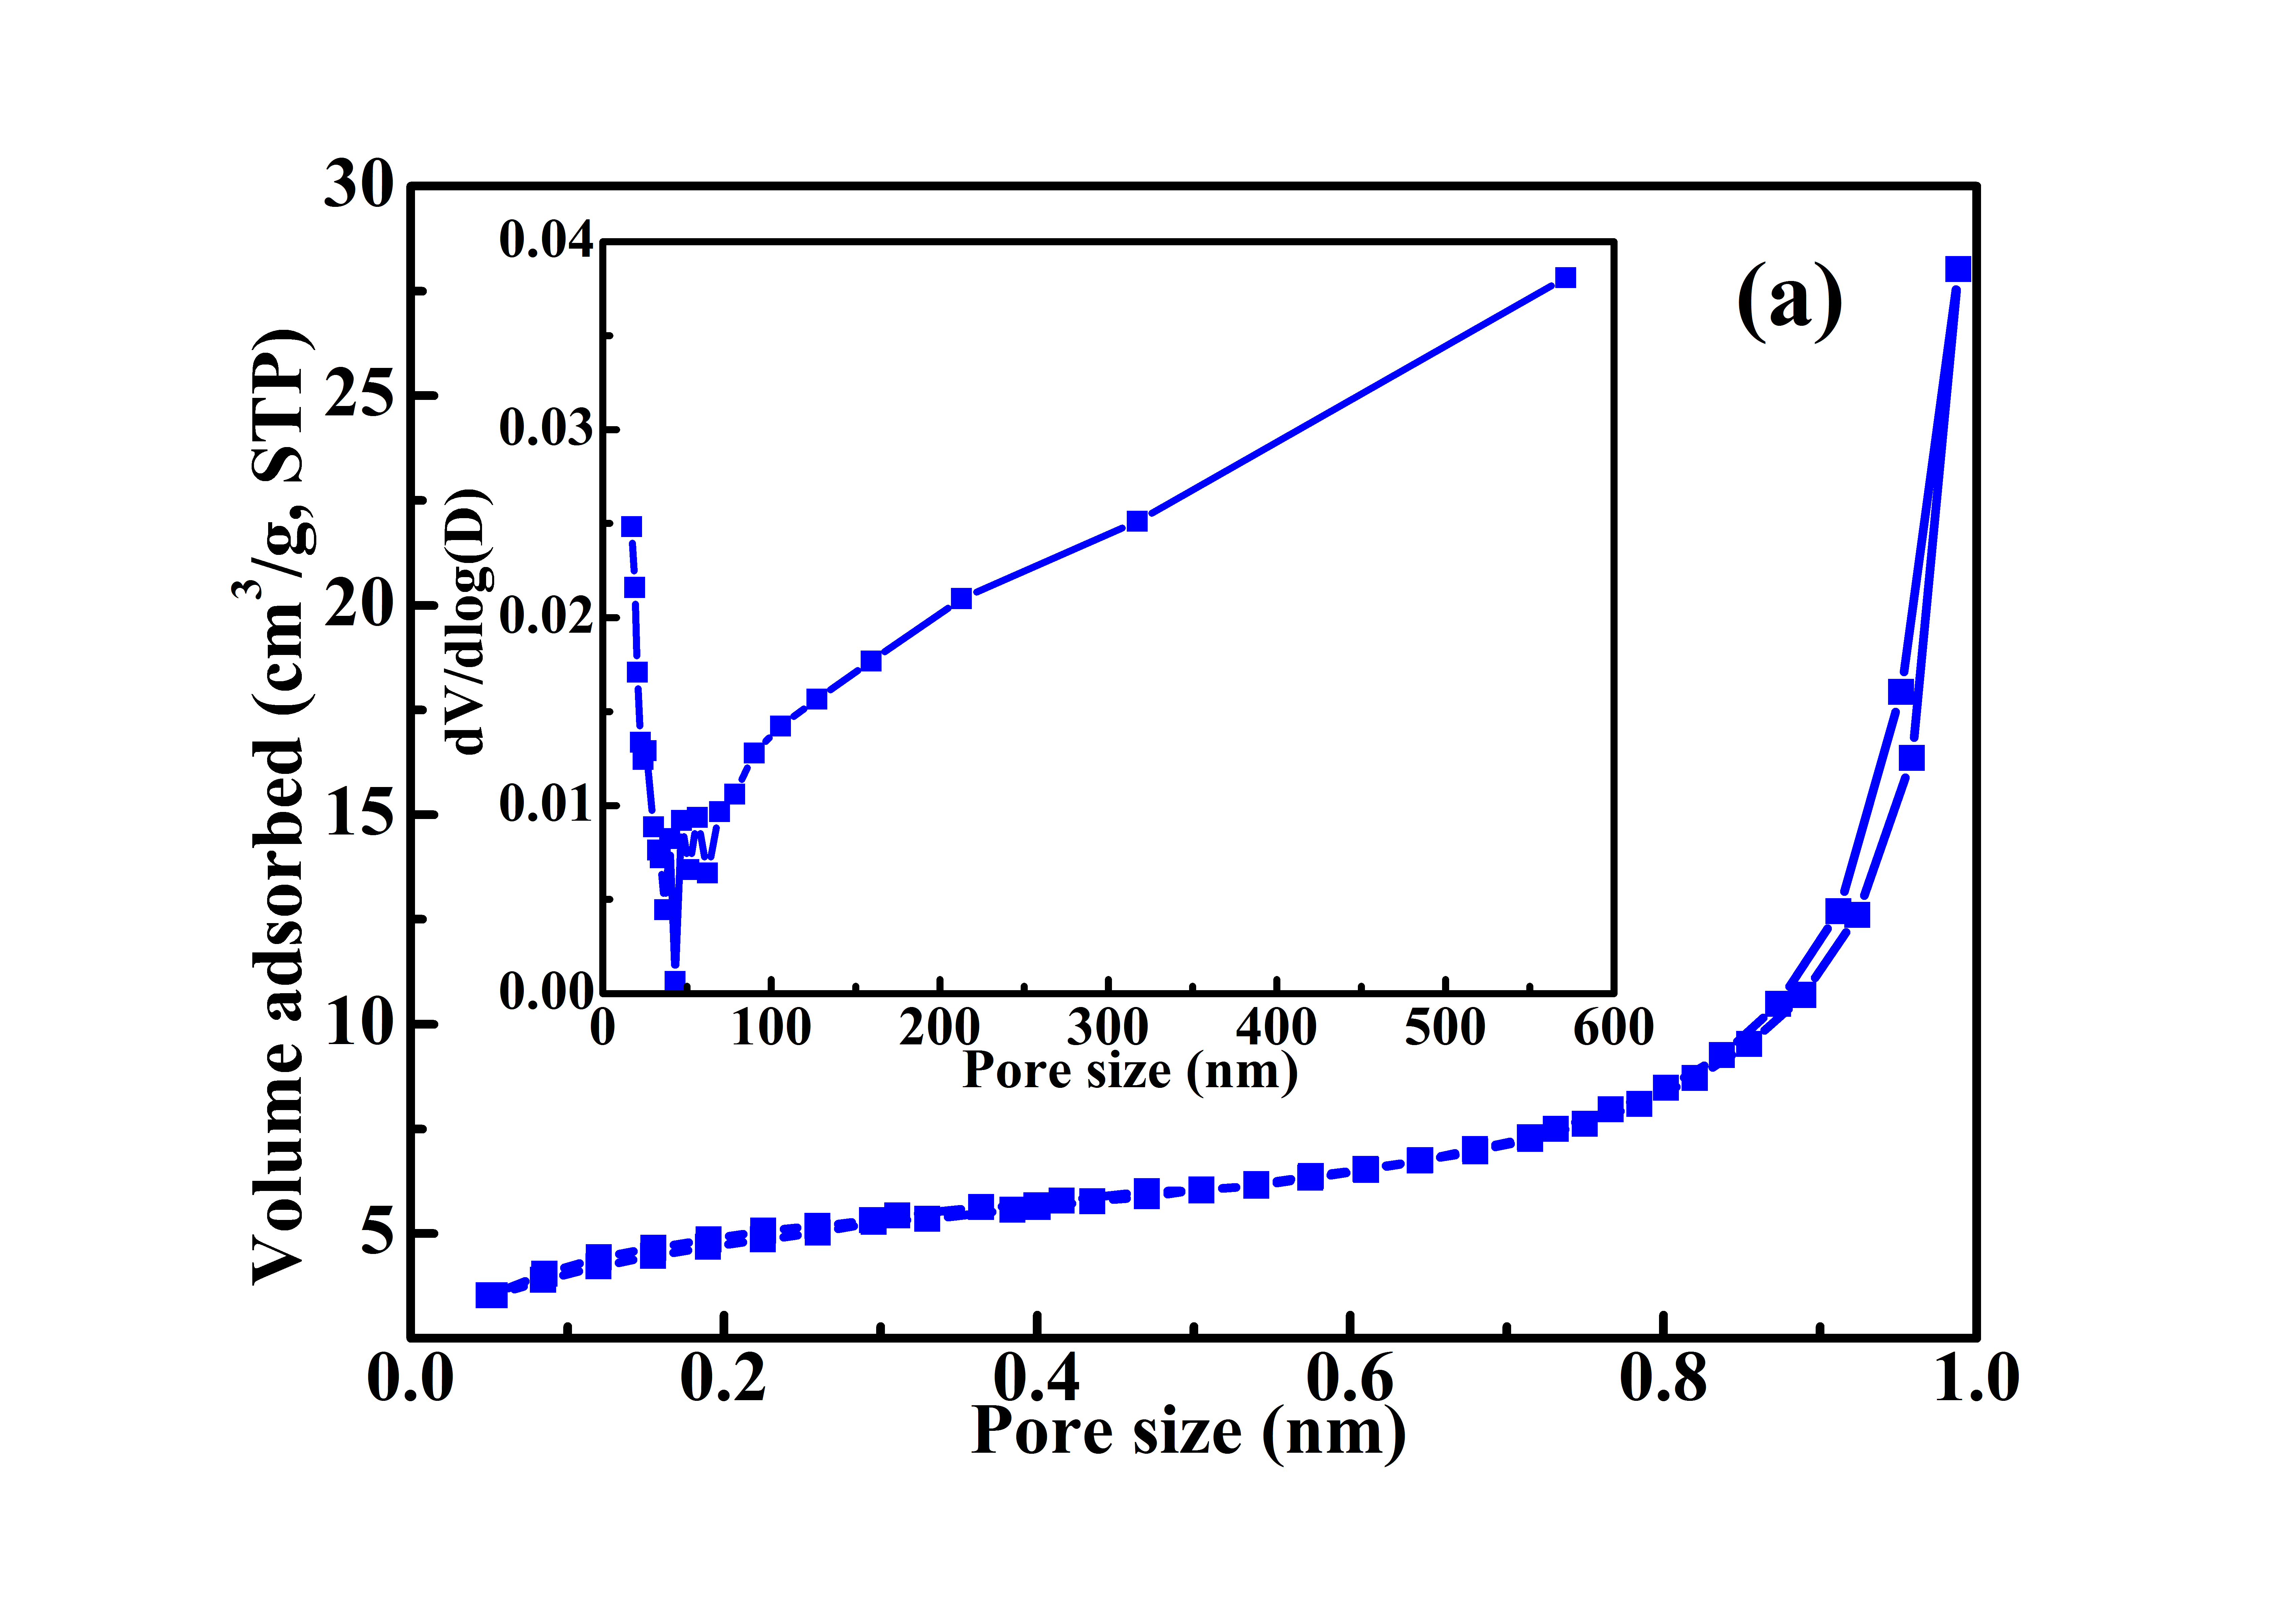

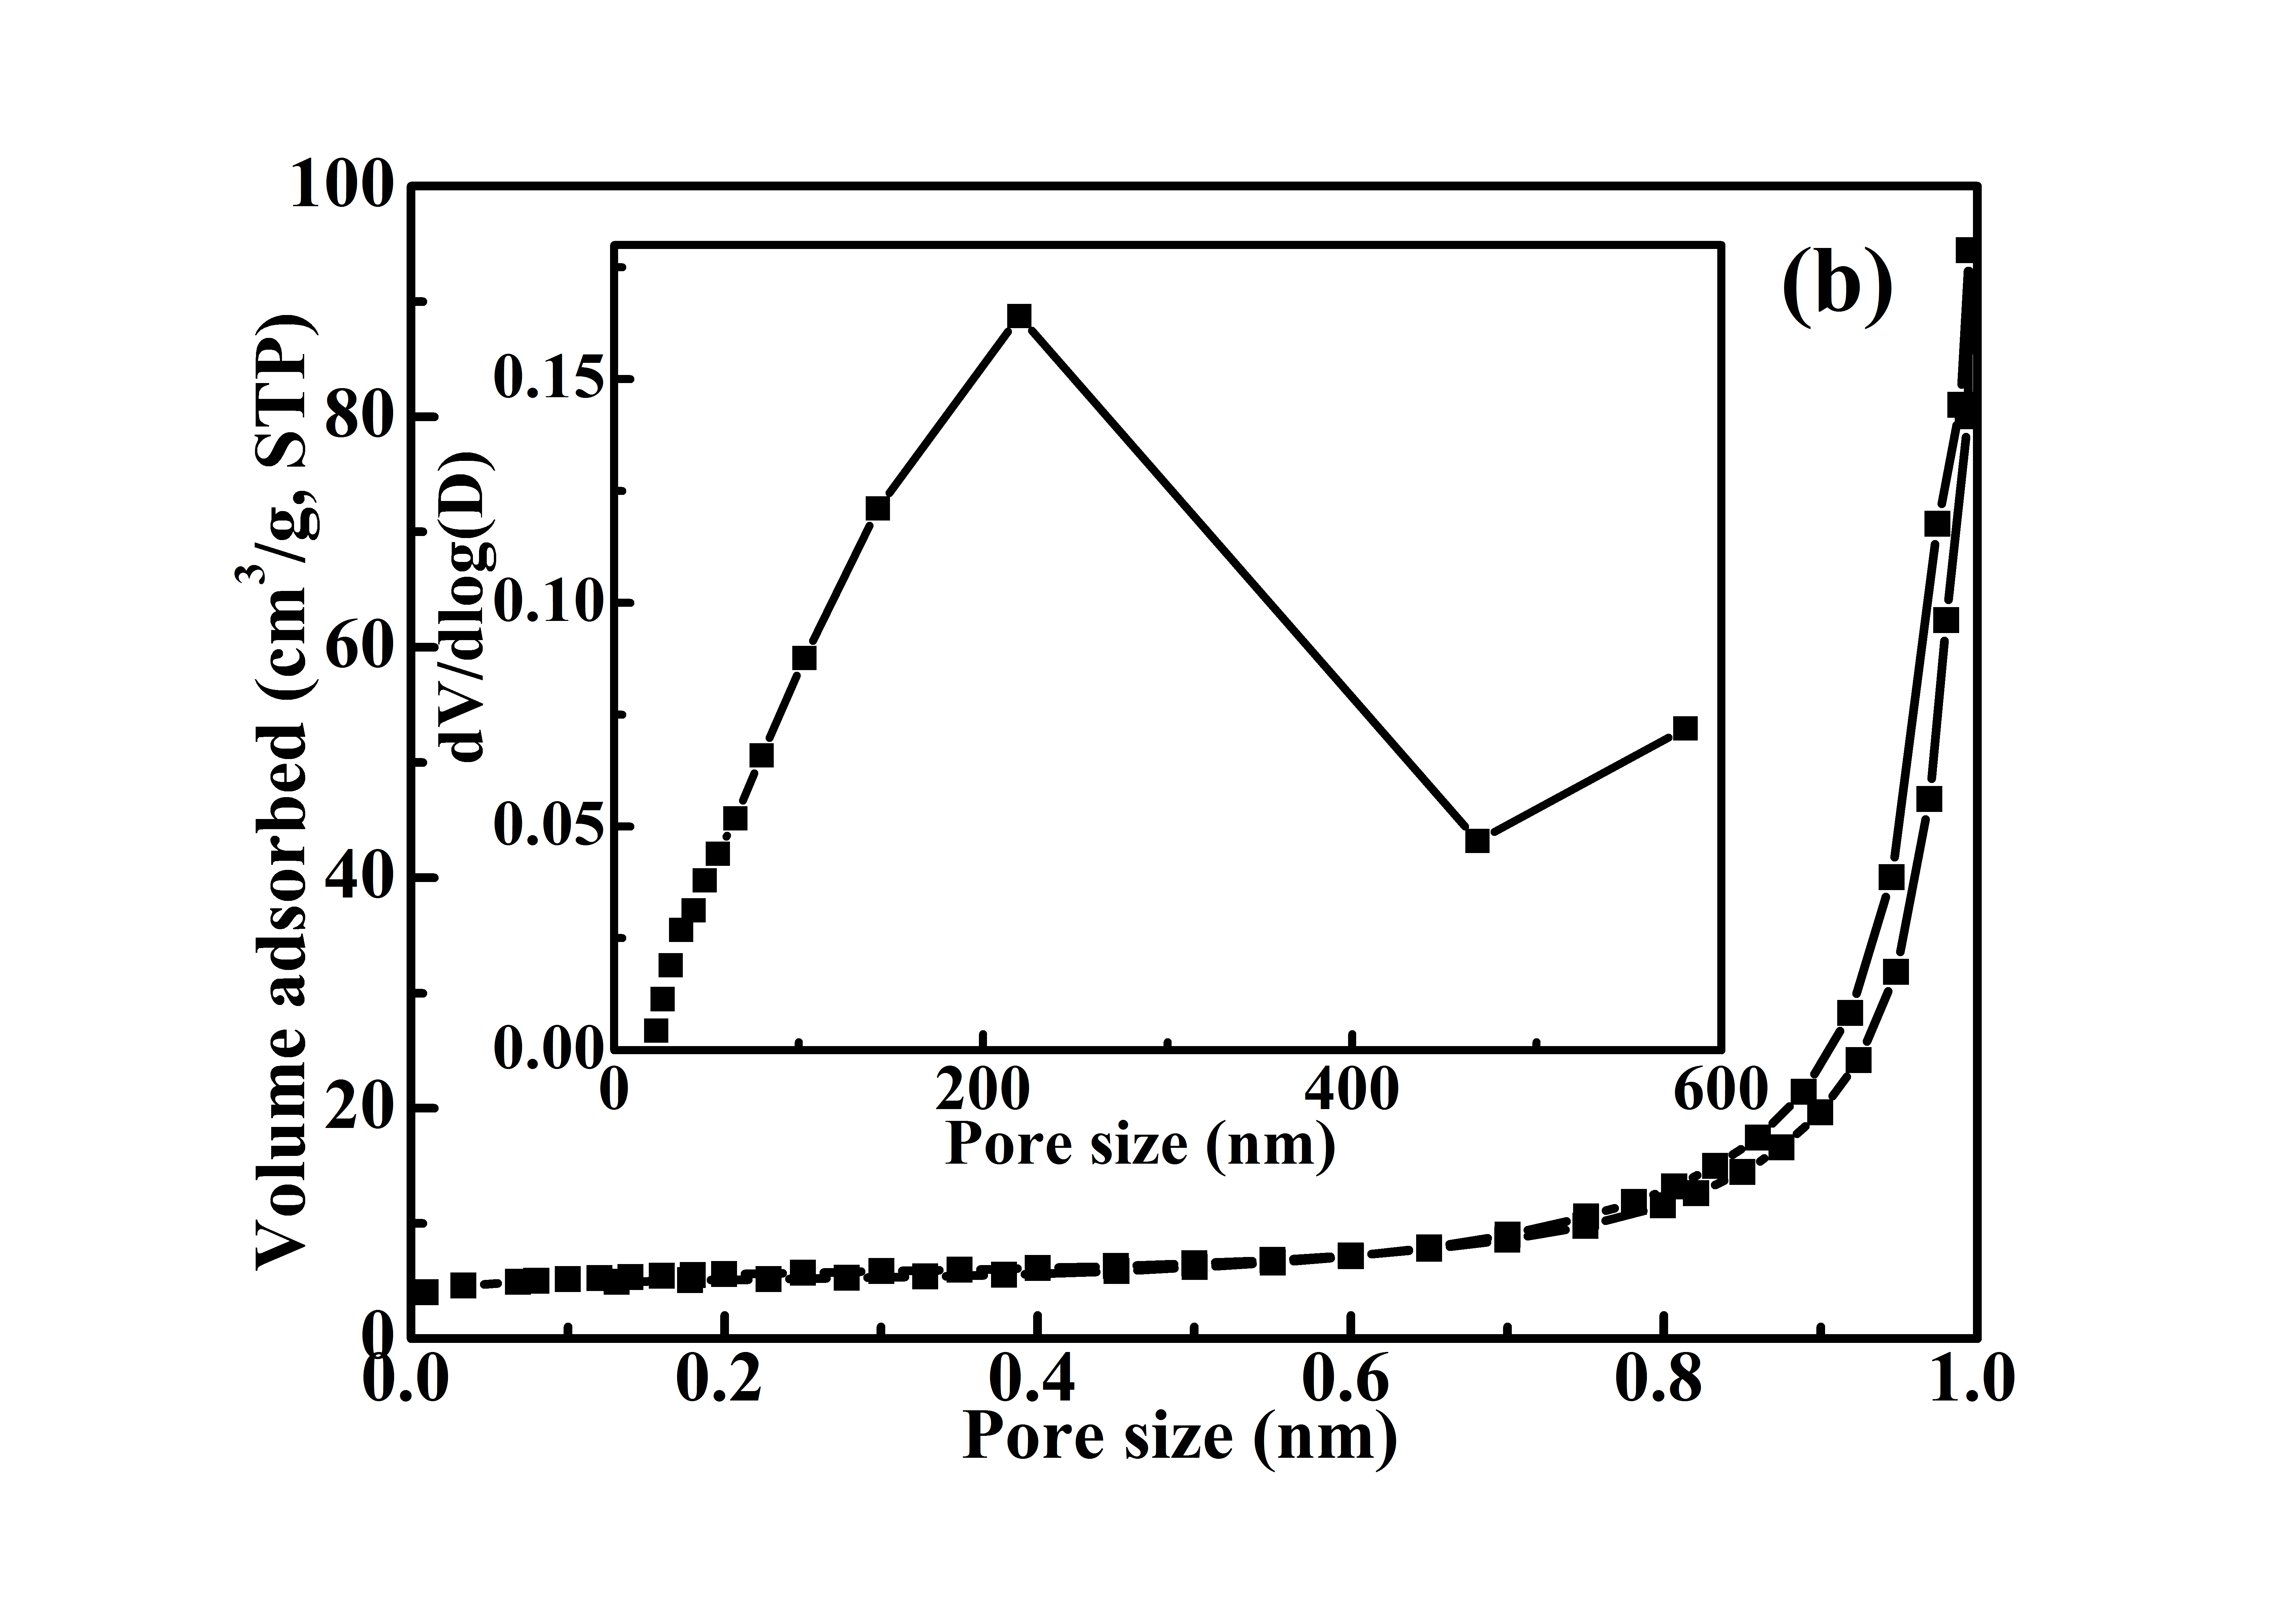


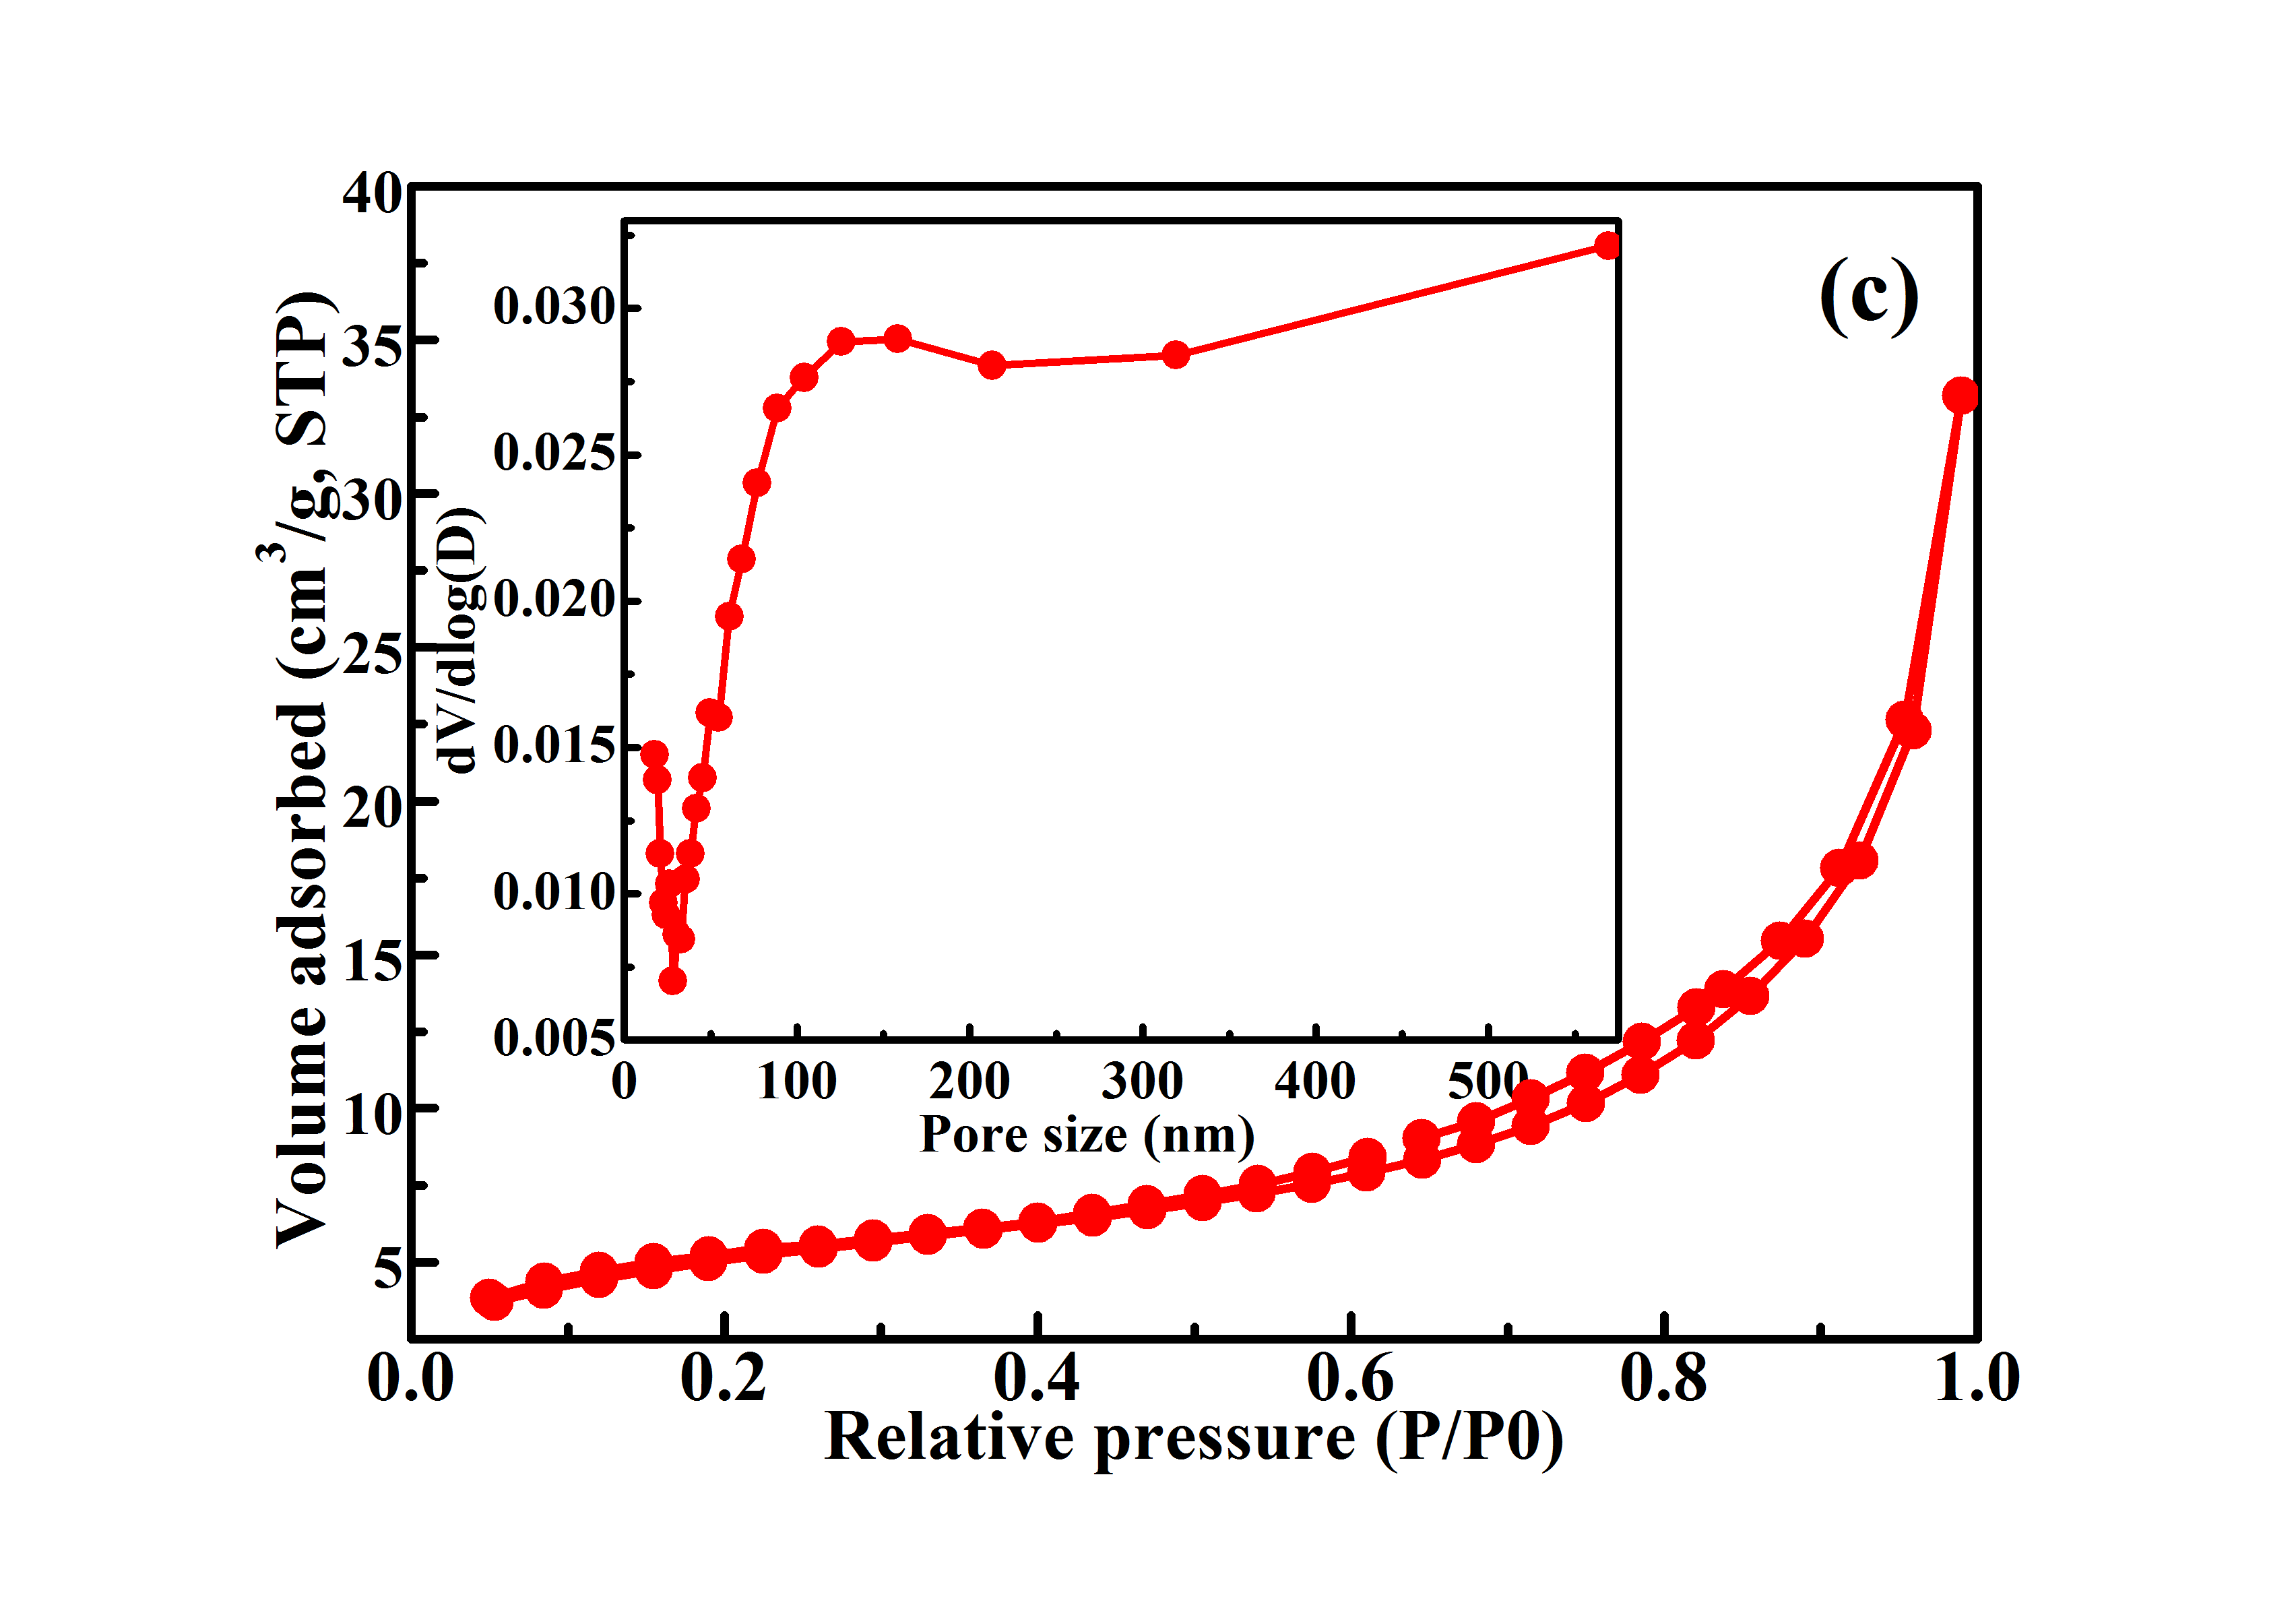


**Figure S2.** N2 adsorption-desorption isotherm and pore size distribution (inset) of (a) the bare *B. Subtilis* and (b) Fe3O4 MNP and (c) Fe3O4@B. subtilis.

N2 adsorption-desorption measurement was conducted to investigate the Brunauer-Emmett-Teller (BET) specific surface area and porous structure of the as-prepared Fe3O4@*B.subtilis*, bare *B. subtilis* and Fe3O4 MNPs. All the isotherms exhibit a type IV pattern according to the International Union of Pure and Applied Chemistry (IUPAC) classification, which corresponds to mesoporous materials, and this can also be affirmed by the pore size distribution (inset images). The surface area for Fe3O4@ *B. subtilis* is 10.95m2 g-1, which is higher than that of *B. subtilis* (5.04 m2 g-1) and lower than that of Fe3O4 (19.30 m2 g-1). The Barrett-Joyner-Halenda (BJH) pore size distribution analyses indicates that the average pore sizes of *B. subtilis* and Fe3O4@ *B. subtilis* were 6.1 and 6.4 nm, respectively, and were within the mesoporous range of 2-50 nm according to the IUPAC classification.


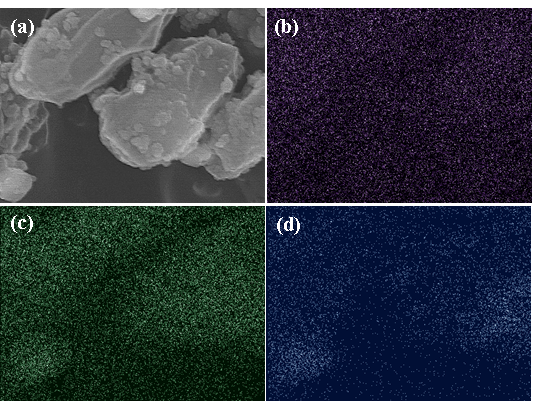


**Figure S3.** Selected zones of Fe3O4@*B. subtilis* SPMC (a) and corresponding X-ray mapping, for C (b), O (c), and Fe elements (d).


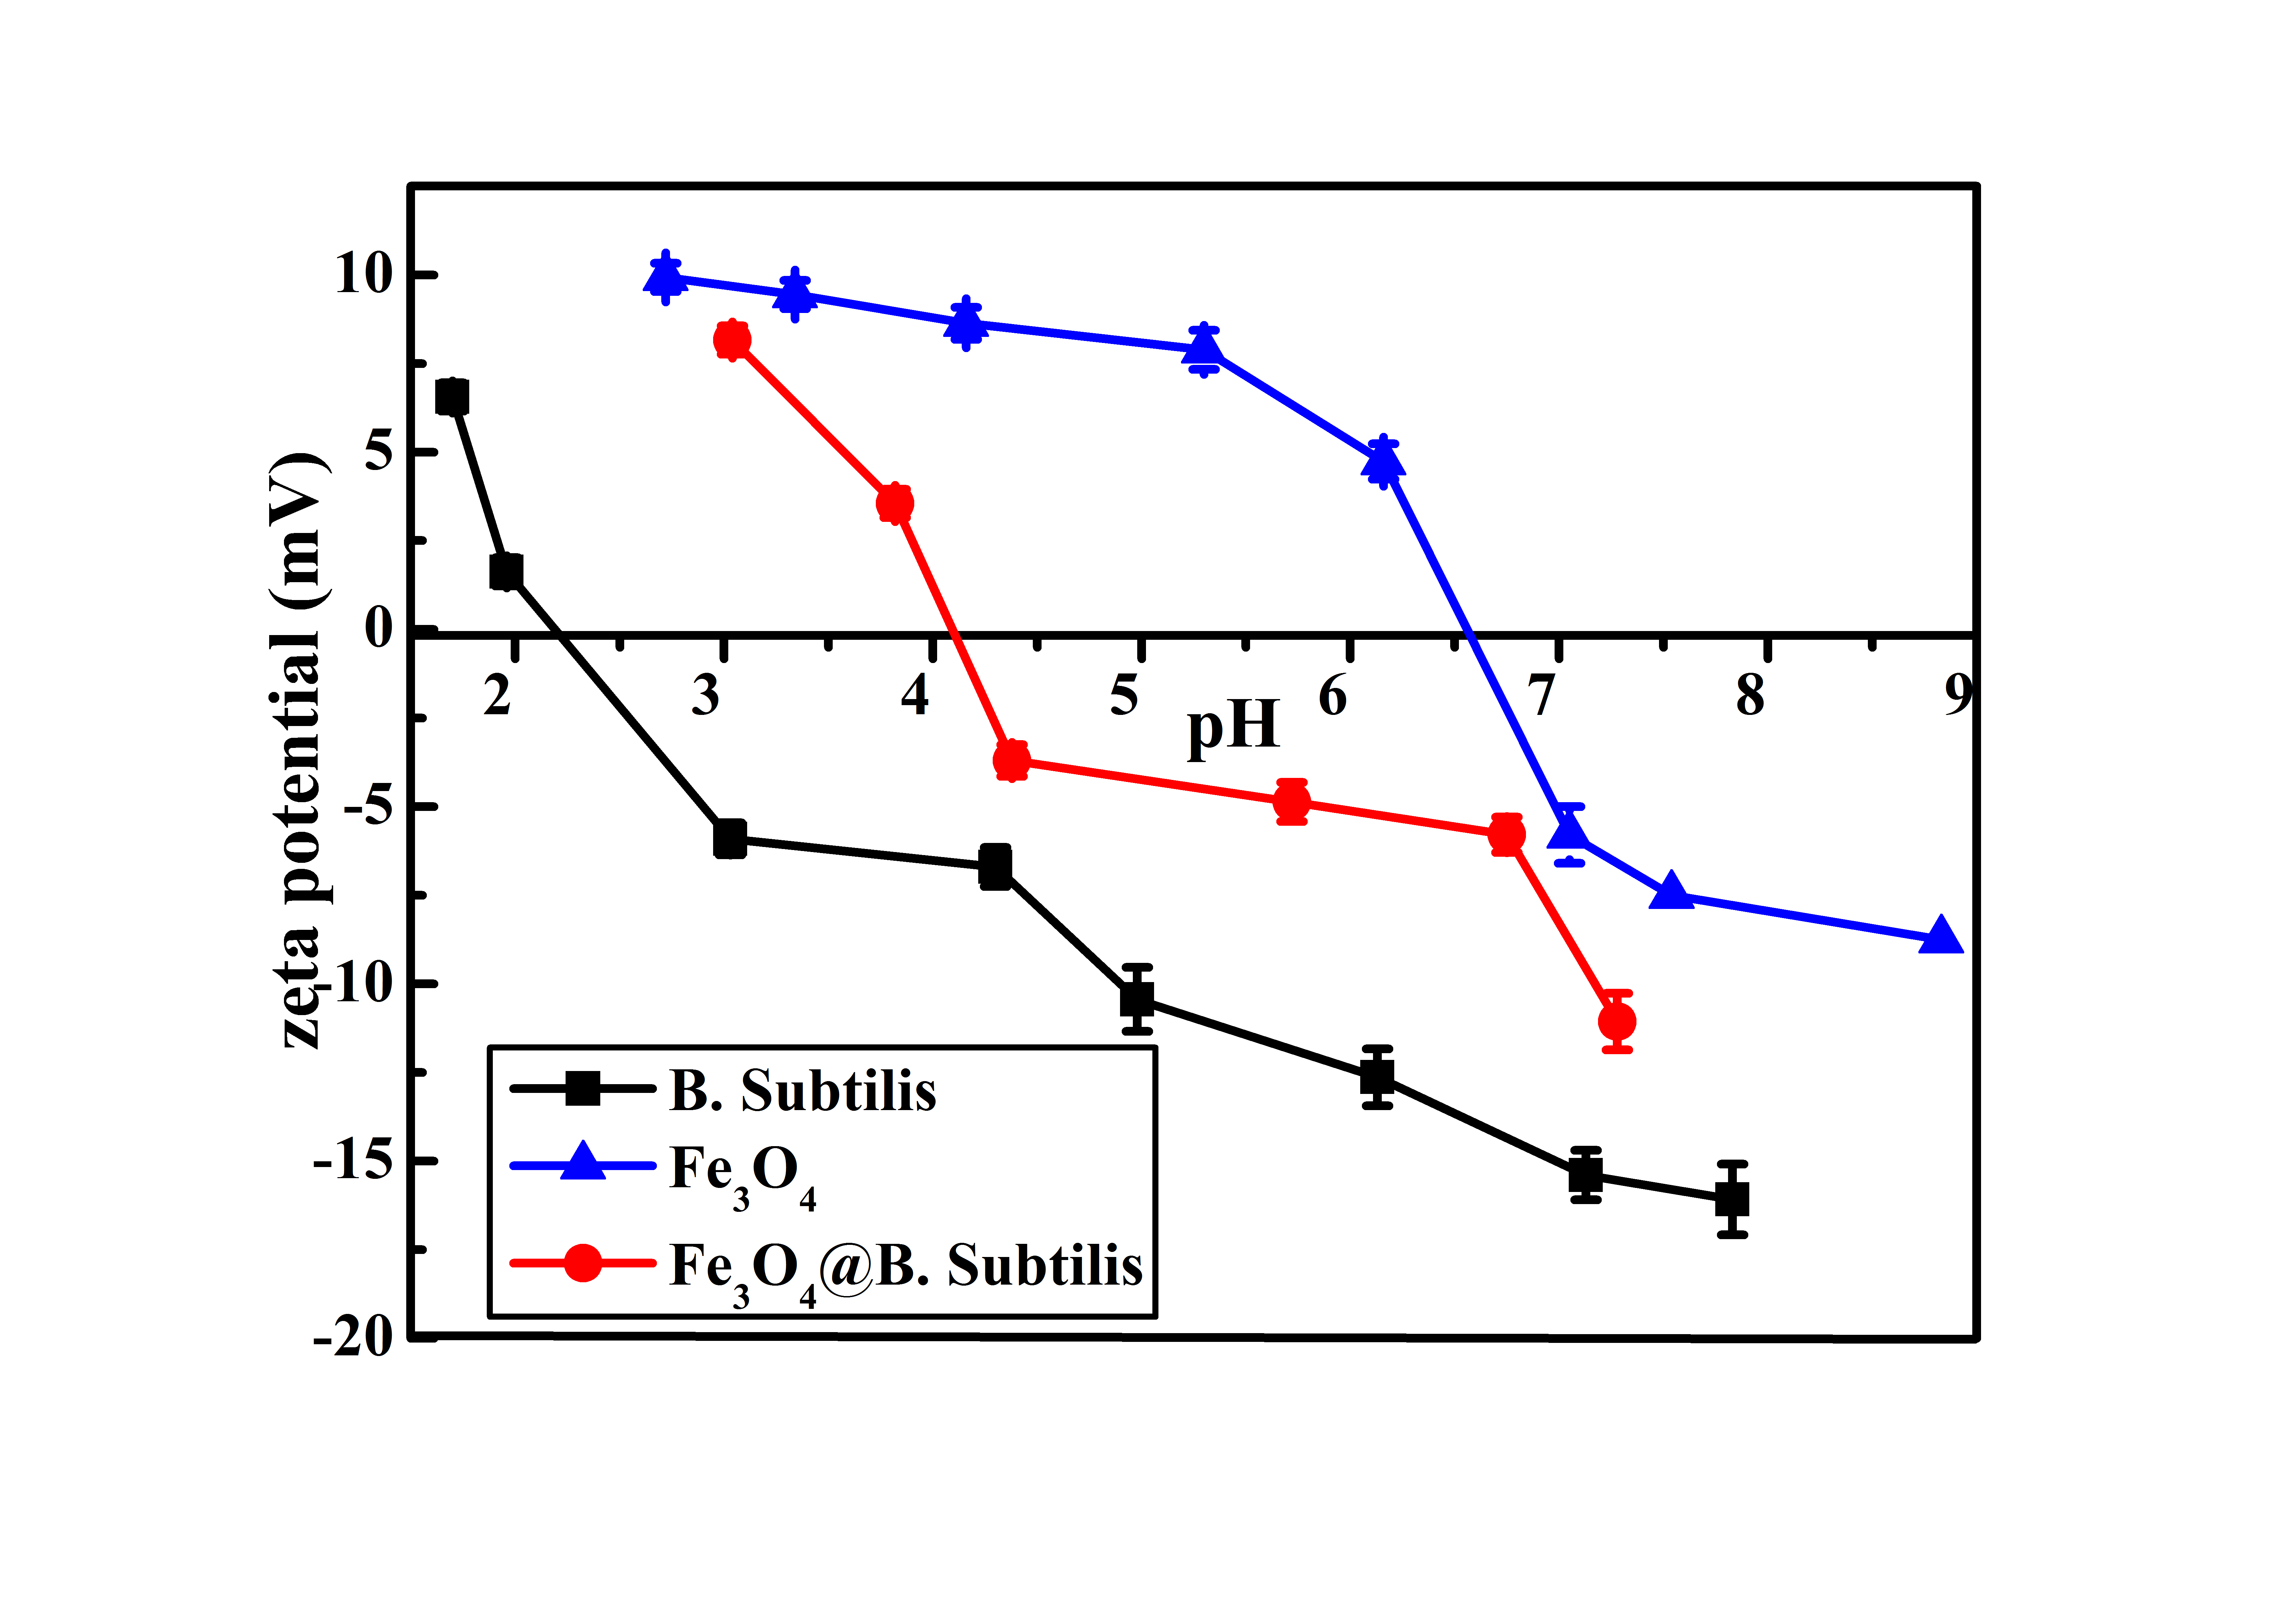


**Figure S4.** Zeta potential of *B.subtilis*, Fe3O4 and Fe3O4@ *B. subtilis* suspensions as a function of pH.

**Figure S5.** Formation of hydroxyl products as the result of reaction between terephthalic acid (TA) and OH•.

**Figure S6.** Schematic illustration of the synthesis process of Fe3O4@ *B. subtilis*.
